# Supplementary material
Source: publisher figshare collection journal article supplement (https://tandf.figshare.com/articles/dataset/_/5693254)
Supplement: Supplementary file 1 [file 1]

## Appendix 1

List of satellite data-sets acquired during the flood seasons of 1998–2015.

| S No | Date      | Satellite/ | S No | Date          | Satellite/ | S No | Date      | Satellite/ Sensor |
|------|-----------|------------|------|---------------|------------|------|-----------|-------------------|
| 1998 |           |            | 2002 |               |            | 2006 |           |                   |
| 1    | 28-Jun-98 | RADARSAT   | 26   | 08-Aug-02     | RADARSAT   | 55   | 26-Jun-06 | RADARSAT          |
| 2    | 21-Jul-98 | RADARSAT   | 2003 |               |            | 56   | 28-Jun-06 | RADARSAT          |
| 3    | 07-Sep-98 | IRS WFS    | 27   | 19-Jun-03     | RADARSAT   | 2007 |           |                   |
| 4    | 08-Sep-98 | IRS WFS    | 28   | 22-Jun-03     | RADARSAT   | 57   | 21-Jun-07 | RADARSAT          |
| 5    | 10-Sep-98 | RADARSAT   | 29   | 03-Jul-03     | RADARSAT   | 58   | 28-Jun-07 | RADARSAT          |
| 6    | 11-Sep-98 | IRS WFS    | 30   | 06-Jul-03     | RADARSAT   | 59   | 22-Jul-07 | RADARSAT          |
| 7    | 13-Sep-98 | IRS WFS    | 31   | 12-Jul-03     | RADARSAT   | 60   | 23-Jul-07 | RADARSAT          |
| 8    | 14-Sep-98 | RADARSAT   | 32   | 16-Jul-03     | RADARSAT   | 61   | 30-Jul-07 | RADARSAT          |
| 1999 |           |            | 33   | 20-Jul-03     | RADARSAT   | 62   | 02-Aug-07 | RADARSAT          |
| 9    | 15-Jun-99 | RADARSAT   | 34   | 06-Jul-03     | IRS OCM    | 63   | 05-Aug-07 | RADARSAT          |
| 10   | 29-Jun-99 | RADARSAT   | 2004 |               |            | 64   | 08-Aug-07 | RADARSAT          |
| 11   | 09-Jul-99 | RADARSAT   | 35   | 288 29-Jun-04 | RADARSAT   | 65   | 16-Aug-07 | RADARSAT          |
| 12   | 30-Jul-99 | RADARSAT   | 36   | 05806 Jul-04  | RADARSAT   | 66   | 26-Aug-07 | RADARSAT          |
| 13   | 02-Aug-99 | RADARSAT   | 37   | 10-Jul-04     | RADARSAT   | 67   | 29-Aug-07 | RADARSAT          |
| 2000 |           |            | 38   | 13-Jul-04     | RADARSAT   | 68   | 01-Sep-07 | RADARSAT          |
| 14   | 27-Jun-00 | RADARSAT   | 39   | 16-Jul-04     | RADARSAT   | 69   | 08-Sep-07 | RADARSAT          |
| 15   | 30-Jun-00 | RADARSAT   | 40   | 20-Jul-04     | RADARSAT   | 70   | 09-Sep-07 | RADARSAT          |
| 16   | 11-Aug-00 | RADARSAT   | 41   | 228 23-Jul-04 | RADARSAT   | 71   | 13-Sep-07 | RADARSAT          |
| 17   | 14-Aug-00 | RADARSAT   | 42   | 27-Jul-04     | RADARSAT   | 72   | 15-Sep-07 | RADARSAT          |
| 2001 |           |            | 43   | 29-Jul-04     | RADARSAT   | 73   | 16-Sep-07 | RADARSAT          |
| 18   | 04-Aug-01 | IRS WFS    | 44   | 30-Jul-04     | RADARSAT   | 74   | 18-Sep-07 | RADARSAT          |
| 19   | 07-Aug-01 | IRS WFS    | 45   | 10-Oct-04     | IRS WFS    | 75   | 25-Sep-07 | RADARSAT          |
| 20   | 23-Aug-01 | IRS WFS    | 46   | 12-Oct-04     | IRS WFS    | 76   | 04-Oct-07 | RADARSAT          |
| 2002 |           |            | 2005 |               |            | 2008 |           |                   |
| 21   | 08-Jul-02 | RADARSAT   | 47   | 16-Jul-05     | RADARSAT   | 77   | 17-Jun-08 | RADARSAT          |
| 22   | 10-Jul-02 | RADARSAT   | 48   | 18-Jul-05     | RADARSAT   | 78   | 23-Jun-08 | RADARSAT          |
| 23   | 26-Jul-02 | RADARSAT   | 49   | 25-Jul-05     | RADARSAT   | 79   | 30-Jun-08 | RADARSAT          |
| 24   | 28-Jul-02 | RADARSAT   | 50   | 01-Sep-05     | RADARSAT   | 80   | 09-Jul-08 | RADARSAT          |
| 25   | 31-Jul-02 | RADARSAT   | 51   | 04-Sep-05     | RADARSAT   | 81   | 16-Jul-08 | RADARSAT          |
|      |           |            | 2006 |               |            | 82   | 19-Jul-08 | RADARSAT          |
|      |           |            | 52   | 02-Jun-06     | RADARSAT   | 83   | 23-Jul-08 | RADARSAT          |
|      |           |            | 53   | 15-Jun-06     | IRS AWFS   | 84   | 02-Aug-08 | RADARSAT          |
|      |           |            | 54   | 16-Jun-06     | RADARSAT   | 85   | 04-Aug-08 | RADARSAT          |

| S No | Date       | Satellite/ Sensor | S No | Date        | Satellite/ Sensor | S No | Date        | Satellite/ |
|------|------------|-------------------|------|-------------|-------------------|------|-------------|------------|
| 2003 |            |                   | 2010 |             |                   | 2013 |             |            |
| 66   | 09-Aug-03  | RADARSAT          | 126  | 20-Aug-2010 | RADARSAT-2        | 167  | 12-Aug-2013 | RADARSAT-2 |
| 67   | 23-Aug-03  | RADARSAT          | 127  | 23-Aug-2010 | RADARSAT-1        | 2014 |             |            |
| 68   | 30-Aug-03  | RADARSAT          | 2011 |             |                   | 168  | 16-08-2014  | RISAT-1    |
| 69   | 02-Sep-03  | RADARSAT          | 128  | 01-07-2011  | RADARSAT-1        | 169  | 19-08-2014  | RADARSAT-2 |
| 70   | 04-Sep-03  | RADARSAT          | 129  | 06-07-2011  | RADARSAT-2        | 170  | 25-08-2014  | RADARSAT-2 |
| 71   | 09-Sep-03  | RADARSAT          | 130  | 08-07-2011  | RADARSAT-1        | 171  | 28-08-2014  | RADARSAT-2 |
| 72   | 12-Sep-03  | RADARSAT          | 131  | 17-07-2011  | RADARSAT-1        | 172  | 24-09-2014  | RADARSAT-2 |
| 73   | 14-Sep-03  | RADARSAT          | 132  | 20-07-2011  | RADARSAT-1        | 173  | 29-09-2014  | RISAT-1    |
| 74   | 21-Sep-03  | RADARSAT          | 133  | 22-07-2011  | RADARSAT-2        | 2015 |             |            |
| 2009 |            |                   | 134  | 23-07-2011  | RADARSAT-2        | 174  | 10-06-2015  | RADARSAT-2 |
| 95   | 01-Jul-09  | RADARSAT          | 135  | 28-07-2011  | RADARSAT-2        | 175  | 12-06-2015  | RADARSAT-2 |
| 96   | 06-Jul-09  | RADARSAT          | 136  | 30-07-2011  | RADARSAT-2        | 176  | 15-06-2015  | RADARSAT-2 |
| 97   | 07-Jul-09  | RADARSAT          | 137  | 03-08-2011  | RADARSAT-1        | 177  | 18-07-2015  | RADARSAT-2 |
| 98   | 09-Jul-09  | RADARSAT          | 138  | 09-08-2011  | RADARSAT-1        | 178  | 21-08-2015  | RISAT-1    |
| 99   | 11-Jul-09  | RADARSAT          | 139  | 13-08-2011  | RADARSAT-2        | 179  | 25-08-2015  | RADARSAT-2 |
| 100  | 15-Jul-09  | RADARSAT          | 140  | 18-08-2011  | RADARSAT-1        | 180  | 04-09-2015  | RADARSAT-2 |
| 101  | 02-Aug-09  | RADARSAT          | 141  | 25-08-2011  | RADARSAT-1        | 181  | 15-09-2015  | RISAT-1    |
|      |            |                   | 2012 |             |                   |      |             |            |
| 102  | 06-Aug-09  | RADARSAT          | 142  | 06-06-2012  | RADARSAT-2        |      |             |            |
| 103  | 16-Aug-09  | RADARSAT          | 143  | 09-06-2012  | RADARSAT-2        |      |             |            |
| 104  | 19-Aug-09  | RADARSAT          | 144  | 20-06-2012  | RADARSAT-1        |      |             |            |
| 105  | 29-Aug-09  | RADARSAT          | 145  | 27-06-2012  | RADARSAT-2        |      |             |            |
| 2010 |            |                   | 146  | 29-06-2012  | RADARSAT-2        |      |             |            |
| 106  | 19-06-2010 | RADARSAT-1        | 147  | 30-06-2012  | RADARSAT-2        |      |             |            |
| 107  | 21-06-2010 | RADARSAT-2        | 148  | 01-07-2012  | RADARSAT-2        |      |             |            |
| 108  | 24-06-2010 | RADARSAT-2        | 149  | 02-07-2012  | RADARSAT-1        |      |             |            |
| 109  | 29-06-2010 | RADARSAT-2        | 150  | 09-07-2012  | RADARSAT-2        |      |             |            |
| 110  | 03-07-2010 | RADARSAT-1        | 151  | 16-07-2012  | RADARSAT-1        |      |             |            |
| 111  | 04-07-2010 | RADARSAT-2        | 152  | 24-07-2012  | RADARSAT-2        |      |             |            |
| 112  | 08-07-2010 | RADARSAT-2        | 153  | 29-07-2012  | RADARSAT-1        |      |             |            |
| 113  | 18-07-2010 | RADARSAT-2        | 154  | 07-08-2012  | RADARSAT-2        |      |             |            |
| 114  | 20-07-2010 | RADARSAT-2        | 155  | 24-08-2012  | RADARSAT-2        |      |             |            |
| 115  | 25-07-2010 | RADARSAT-2        | 156  | 29-08-2012  | RADARSAT-1        |      |             |            |
| 116  | 28-07-2010 | RADARSAT-2        | 157  | 16-09-2012  | RISAT-1           |      |             |            |
| 117  | 31-07-2010 | RADARSAT-1        | 158  | 19-09-2012  | RADARSAT-2        |      |             |            |
| 118  | 17-08-2010 | RADARSAT-1        | 159  | 22-09-2012  | RADARSAT-1        |      |             |            |
| 119  | 23-08-2010 | RADARSAT-1        | 160  | 24-09-2012  | RADARSAT-2        |      |             |            |
| 120  | 24-08-2010 | RADARSAT-2        | 161  | 29-09-2012  | RADARSAT-1        |      |             |            |
| 121  | 29-08-2010 | RADARSAT-2        | 2013 |             |                   |      |             |            |
| 122  | 06-09-2010 | RADARSAT-2        | 162  | 01-07-2013  | RADARSAT-2        |      |             |            |
| 123  | 11-09-2010 | RADARSAT-2        | 163  | 02-07-2013  | RADARSAT-2        |      |             |            |
| 124  | 16-09-2010 | RADARSAT-2        | 164  | 09-07-2013  | RADARSAT-2        |      |             |            |
| 125  | 18-09-2010 | RADARSAT-1        | 165  | 14-08-2013  | RADARSAT-2        |      |             |            |
|      |            |                   | 166  | 09-09-2013  | RADARSAT-2        |      |             |            |
